# Supplementary material
Source: PubMed Central journal article supplement (PMC8823958)
Supplement: mmc1.pdf [file mmc1.pdf]

**Supplemental information**

**SARS-CoV-2 Omicron Spike recognition by plasma  
from individuals receiving BNT162b2 mRNA  
vaccination with a 16-week interval between doses**

**Debashree Chatterjee, Alexandra Tauzin, Lorie Marchitto, Shang Yu Gong, Marianne Boutin, Catherine Bourassa, Guillaume Beaudoin-Bussières, Yuxia Bo, Shilei Ding, Annemarie Laumaea, Dani Vézina, Josée Perreault, Laurie Gokool, Chantal Morriveau, Pascale Arlotto, Éric Fournier, Aurélie Guilbault, Benjamin Delisle, Inès Levade, Guillaume Goyette, Gabrielle Gendron-Lepage, Halima Medjahed, Gaston De Serres, Cécile Tremblay, Valérie Martel-Laferrrière, Daniel E. Kaufmann, Renée Bazin, Jérémie Prévost, Sandrine Moreira, Jonathan Richard, Marceline Côté, and Andrés Finzi**

**A****Full-Spike binding**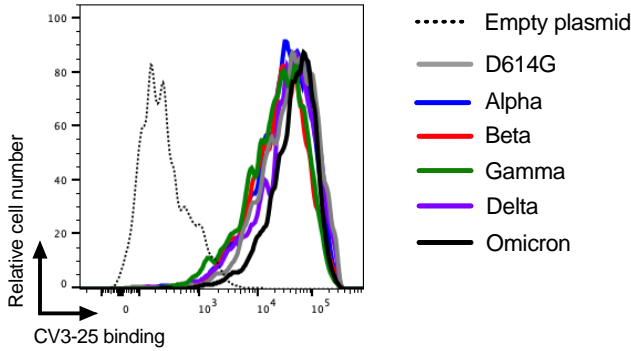**B****Neutralization**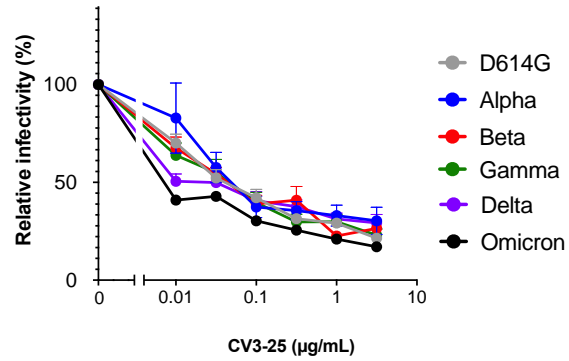

**Supplemental Figure 1. Recognition and neutralization of different VOCs Spikes by the anti-S2 neutralizing CV3-25 antibody. Related to Figure 1.**

(A) 293T cells were transfected with the full-length Spikes from different VOCs (D614G, Alpha, Beta, Gamma, Delta and Omicron), stained with the CV3-25 Ab and analyzed by flow cytometry. Shown are histograms showing a representative staining on Spike-expressing GFP+ cells. (B) CV3-25 neutralizing activity against pseudoviral particles bearing the different VOC Spikes. Data shown are the mean  $\pm$  SEM from at least two independent experiments.

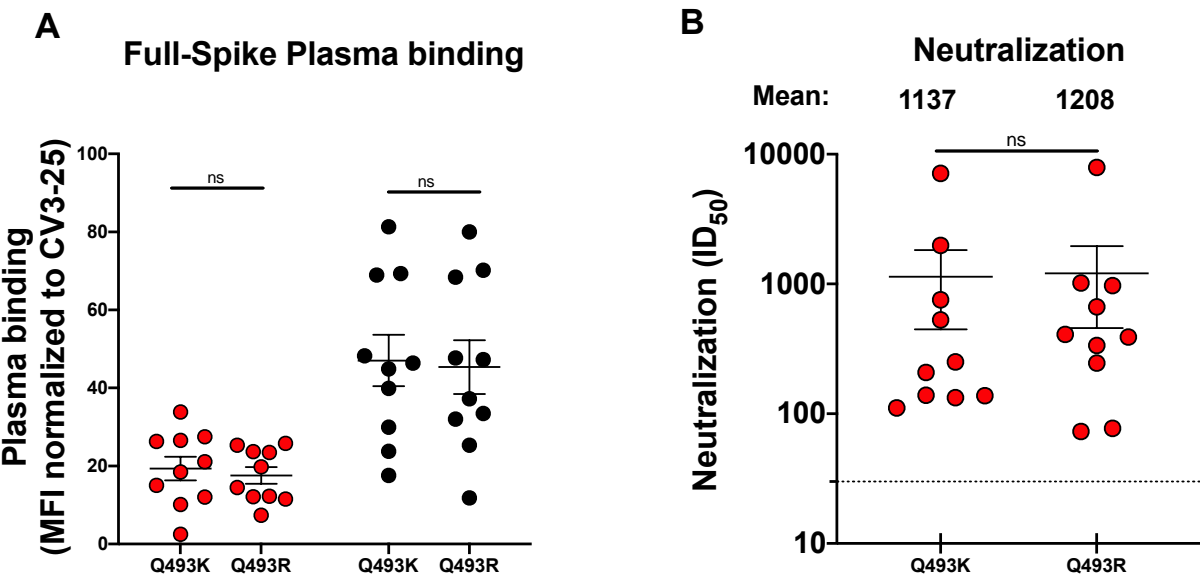

**Supplemental Figure 2. Recognition and neutralization of Omicron Spikes with Q493K or Q493R changes. Related to Figures 1 and 2.**

(A) 293T cells were transfected with the full-length Spikes of Omicron possessing either Q493K or Q493R mutation, stained with the CV3-25 Ab or with plasma collected 3 weeks (V3) after the second dose with a 16-week interval from naïve or previously-infected donors, represented by red and black points respectively and analyzed by flow cytometry. (B) Neutralizing activity was measured by incubating pseudoviruses bearing SARS-CoV-2 Spikes of the two different Omicron mutants as mentioned above, with serial dilutions of plasma collected 3 weeks (V3) after the second dose with a 16-week interval from naïve donors for 1 h at 37°C before infecting 293T-ACE2 cells. Neutralization half maximal inhibitory serum dilution ( $ID_{50}$ ) values were determined using a normalized non-linear regression using GraphPad Prism software. Error bars indicate means  $\pm$  SEM. For each group  $n=10$  donors have been used. Each symbol/points indicates one donor. Statistical significance was tested using a Wilcoxon test (ns, non-significant).
